# Supplementary material for: Cancer Derived Exosomes Induce Macrophages Immunosuppressive Polarization to Promote Bladder Cancer Progression
Source: Research Square preprint supplement (doi:10.21203/rs.3.rs-342320/v1), 2021-03-23
Supplement: Supplementary file 1 [file abb04e9b1518e61182c47cde.docx]

**Supplementary table 2. Antibody list.**

| **Antibodies** | **Company** | **Lot No.** | [**concentration**](javascript:;) |
| --- | --- | --- | --- |
| APC/Cyanine7 anti-mouse F4/80 Antibody | Biolegend | 123118 | Flow Cyt 1:100 |
| PerCP/Cyanine5.5 anti-mouse CD206 (MMR) Antibody | Biolegend | 141716 | Flow Cyt 1:100 |
| PerCP anti-mouse CD8a Antibody | Biolegend | 100732 | Flow Cyt 1:100 |
| APC/Cyanine7 anti-mouse CD4 Antibody | Biolegend | 100414 | Flow Cyt 1:100 |
| FITC Rat Anti Mouse CD11b | BD | 553310 | Flow Cyt 1:100 |
| Phospho-Akt (Thr308) (D25E6) | Cell Signaling Technology | 13038s | WB 1:1000 |
| Phospho-Stat3 (Tyr705) (D3A7) | Cell Signaling Technology | 9145S | WB 1:1000 |
| Phospho-Stat6 (Tyr641) Antibody | Cell Signaling Technology | 9361S | WB 1:1000 |
| Phospho-PI3 Kinase p85 (Tyr458)/p55 (Tyr199) (E3U1H) Rabbit mAb | Cell Signaling Technology | 17366S | WB 1:1000 |
| PTEN Antibody | Abcam | Ab32199 | WB 1:1000 |
| CD63 Antibody | Santa Cruz | Sc-15363 | WB 1:500 |
| HSP90 (C45G5) Rabbit mAb | Cell Signaling Technology | 4877S | WB 1:1000 |
| Beta Actin Monoclonal antibody | Proteintech | BC002409 | WB 1:200000 |
| HRP Goat Anti-Rabbit IgG | ABclonal | AS014 | WB 1:3000 |
|  |  |  |  |
